# Supplementary material for: Application of a satellite-retrieved sheltering parameterization (v1.0) for dust event simulation with WRF-Chem v4.1
Source: Copernicus journal article supplement (doi:10.5194/gmd-16-1009-2023), 2023-02-09
Supplement: Supplementary file 1 [file gmd-16-1009-2023-supplement.pdf]

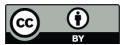

*Supplement of*

## **Application of a satellite-retrieved sheltering parameterization (v1.0) for dust event simulation with WRF-Chem v4.1**

**Sandra L. LeGrand et al.**

*Correspondence to:* Sandra L. LeGrand ([sandra.l.legrand@usace.army.mil](mailto:sandra.l.legrand@usace.army.mil))

The copyright of individual parts of the supplement might differ from the article licence.

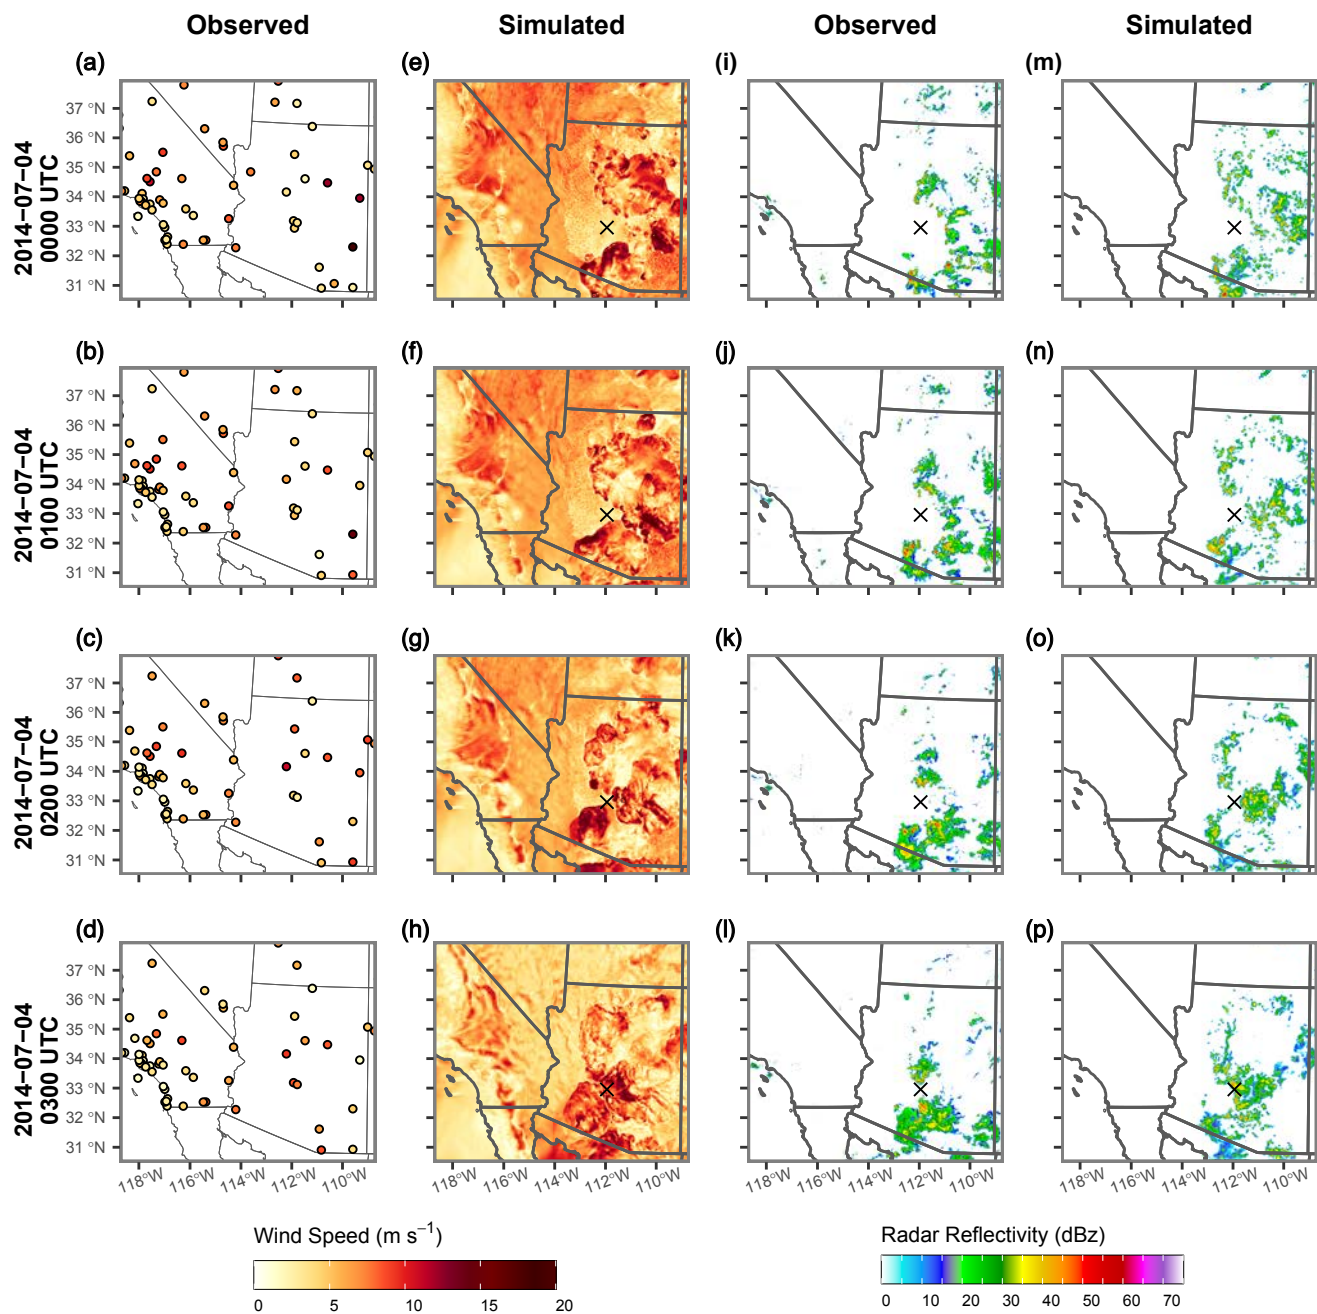

**Figure S1:** (a)-(d) Observed ASOS wind speed, (e)-(h) simulated wind speed, (i)-(l) NEXRAD composite radar reflectivity, and (m)-(p) simulated radar reflectivity for 4 July 2014, 0000-0300 UTC. The black  $\times$  marks the location of Phoenix, Arizona.
